# Supplementary material for: A Novel, Drug Resistance-Independent, Fluorescence-Based Approach To Measure Mutation Rates in Microbial Pathogens
Source: PubMed Central journal article supplement (PMC6391916; doi:10.1128/mbio.00120-19), 2019-02-26

Supplementary figure 3.

ATCC2001

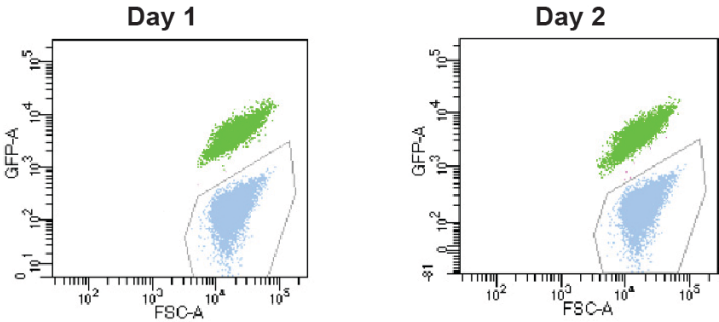

Clinical isolate 1

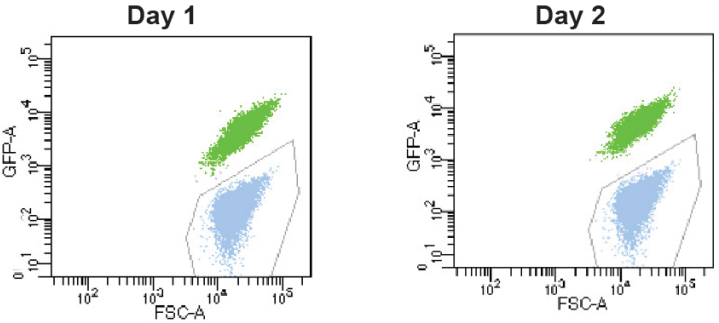

Clinical isolate 2

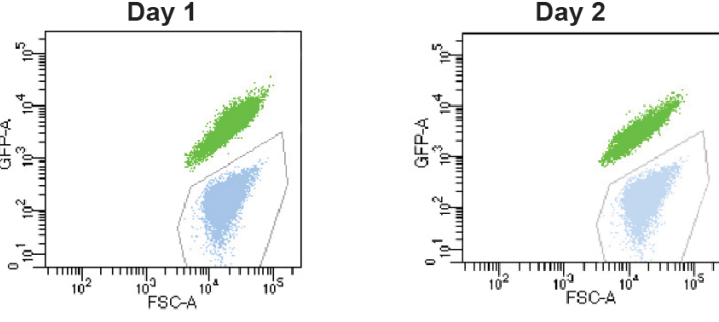

Supplement: mBio.00120-19-sf003.pdf [file mBio.00120-19-sf003.pdf]
